## Correction: Unanticipated prognosis of differential thyroid cancer patients with T0 stage: analysis of the SEER database 2004-2013

Chunping Liu<sup>1,\*</sup>, Jie Ming<sup>1,\*</sup>, Wen Zeng<sup>2</sup>, Shuntao Wang<sup>1</sup>, Yiquan Xiong<sup>1</sup>, Qiuyang Zhao<sup>1</sup>, Xingjie Yin<sup>1</sup>, Zeming Liu<sup>1</sup> and Tao Huang<sup>1</sup>

<sup>1</sup> Department of Breast and Thyroid Surgery, Union Hospital, Tongji Medical College, Huazhong University of Science and Technology, Wuhan 430022, China

<sup>2</sup> Department of Ophthalmology, Zhongnan Hospital, Wuhan University, Wuhan, China

\* These authors have contributed equally to this work

**Published:** March 23, 2018

**Copyright:** Liu et al. This is an open-access article distributed under the terms of the Creative Commons Attribution License 3.0 (CC BY 3.0), which permits unrestricted use, distribution, and reproduction in any medium, provided the original author and source are credited.

**This article has been corrected:** The proper name of the institution is as follows:

<sup>1</sup> Department of Breast and Thyroid Surgery, Union Hospital, Tongji Medical College, Huazhong University of Science and Technology, Wuhan 430022, China

Original article: Oncotarget. 2017; 8:70777-70787. <https://doi.org/10.18632/oncotarget.19988>
